# Supplementary material
Source: HighWire-hosted journal article supplement (https://bmjopen.bmj.com/content/13/9/e066171)
Supplement: inline-supplementary-material-4 [file inline-supplementary-material-4.pdf]

**Supplemental Table 1** Characteristics of selected studies.

| Author, year       | Location | Design | No (I/C) | Age (I/C)<br>(year) | Operation             | Brand name of lipids | Duration (day) | Dose (day) | Control group                                         | Time of tested blood (day) | Adjustments                                                                                                                                                            |
|--------------------|----------|--------|----------|---------------------|-----------------------|----------------------|----------------|------------|-------------------------------------------------------|----------------------------|------------------------------------------------------------------------------------------------------------------------------------------------------------------------|
| Zhu, 2013 [47]     | China    | RCT    | 33/33    | 48.62/51.52         | Liver Transplantation | Omegaven             | 7              | 2ml/kg     | PN without supplementation of $\omega$ -3 fatty acids | 2                          | Age, sex, Child Pugh classification of hepatic function, operation duration, anhepatic phase, and postoperative immunosuppression therapy                              |
| Wang, 2011 [49]    | China    | RCT    | 41/41    | 51.93/58.13         | Hepatectomy           | Omegaven             | 6              | —          | Medium and Long Chain Fat Emulsion Injection          | 3                          | Age, sex, Child-Pugh Score                                                                                                                                             |
| Tao, 2011 [50]     | China    | RCT    | 18/18    | 51.52/48.62         | Liver Transplantation | Omegaven             | 6              | 100ml      | $\omega$ -3/ $\omega$ -6: 1/2 (I), 1/7 (C)            | 2                          | Age, sex, BMI, MELD, Child-pugh score, etiology, operative time, blood lose                                                                                            |
| Gong, 2016 [51]    | China    | RCT    | 59/60    | 51.37/49.63         | Hepatectomy           | Omegaven             | 5              | 100ml      | regular nutrition group (Kabiven)                     | 3                          | Age, gender, BMI, Child-pugh score, ICG R15, pathology, resection range, blood loss, Pringle time or surgery time                                                      |
| Guo, 2018 [52]     | China    | RCT    | 15/15    | —                   | Hepatectomy           | Fresenius Kabi       | 6              | —          | Lipofundin (fat emulsion; Braun, Germany)             | —                          | Age, sex, number of T-cell sub-types, cellular inflammatory factors and immunoglobulin                                                                                 |
| Wu, 2012 [53]      | China    | RCT    | 31/32    | 52.00/52.16         | Hepatectomy           | Omegaven             | 5              | 1.5 g/kg   | without omega-3 fatty acid supplement                 | 6                          | Age, sex, diagnosis, warm ischemia time, body mass index, liver function, blood loss and duration of surgery                                                           |
| Zhang, 2016 [54]   | China    | RCT    | 157/155  | 47.6/49.6           | Hepatectomy           | Omegaven             | 5              | —          | $\omega$ -3/ $\omega$ -6: 1/2 (I), 1/7 (C)            | 3                          | Age, sex, weight, Child-Pugh Score, serum HBsAg and HBV-DNA status, FLR/SLV, serum biochemical parameters, Th/ Ts, NRI after PN and associated therapy after admission |
| Ibrahim, 2016 [55] | Egypt    | RCT    | 20/20    | 30.20/31.00         | Liver Transplantation | Fresenius Kabi       | 2              | 7 mL/kg    | the same infusion rate of glucose 5% as placebo       | 3                          | Age, sex, BMI, graft (RT/LT lobe), fluid requirements, crystalloids, colloids, operative time                                                                          |

Abbreviations: I the intervention group, C the control group,  $\omega$ -3  $\omega$ -3 polyunsaturated fatty acid,  $\omega$ -6  $\omega$ -6 polyunsaturated fatty acid, MCT/LCT medium and long-chain triglycerides
