# Supplementary material
Source: HighWire-hosted journal article supplement (https://bmjopen.bmj.com/content/13/9/e066171)
Supplement: inline-supplementary-material-5 [file inline-supplementary-material-5.pdf]

**Supplemental Table 3** Quality assessment based on laboratory test and clinical indexes of the ω-3 PUFAs support in patients undergoing liver operation.

| Quality assessment          |        |                  |                          |               |              |                      |                         | No of patients<br>(I/C) | Effect               |                                             | Quality          | Importance |
|-----------------------------|--------|------------------|--------------------------|---------------|--------------|----------------------|-------------------------|-------------------------|----------------------|---------------------------------------------|------------------|------------|
| Outcomes                    | Design | No of<br>studies | Risk of<br>bias          | Inconsistency | Indirectness | Imprecision          | Other<br>considerations |                         | Relative<br>(95% CI) | Absolute                                    |                  |            |
| Liver function              |        |                  |                          |               |              |                      |                         |                         |                      |                                             |                  |            |
| AST<br>[47, 49, 51, 53, 55] | RCT    | 5                | serious <sup>1,2</sup>   | no serious    | no serious   | serious <sup>3</sup> | none                    | 184/186                 | —                    | MD 42.72 lower (71.91 to 13.52 lower)       | ⊕⊕OO<br>LOW      | Important  |
| ALT<br>[47, 49, 51, 53-55]  | RCT    | 6                | serious <sup>1,2</sup>   | no serious    | no serious   | no serious           | none                    | 341/341                 | —                    | MD 38.9 lower (65.44 to 12.37 lower)        | ⊕⊕⊕O<br>MODERATE | Important  |
| Tbil<br>[47, 49, 51, 53-55] | RCT    | 6                | serious <sup>1,2</sup>   | no serious    | no serious   | no serious           | none                    | 341/341                 | —                    | MD 0.97 lower (2.5 lower to 0.57 higher)    | ⊕⊕⊕O<br>MODERATE | Important  |
| Alb<br>[47, 49, 51, 53-55]  | RCT    | 6                | serious <sup>1,2</sup>   | no serious    | no serious   | no serious           | none                    | 341/341                 | —                    | MD 0.42 higher (0.26 to 0.57 higher)        | ⊕⊕⊕O<br>MODERATE | Important  |
| Makers of inflammation      |        |                  |                          |               |              |                      |                         |                         |                      |                                             |                  |            |
| WBC<br>[49, 54, 55]         | RCT    | 3                | serious <sup>1,2</sup>   | no serious    | no serious   | no serious           | none                    | 218/216                 | —                    | MD 0.93 lower (1.6 to 0.26 lower)           | ⊕⊕⊕O<br>MODERATE | Important  |
| TNF-α<br>[50, 52, 53]       | RCT    | 3                | serious <sup>1,2</sup>   | no serious    | no serious   | serious <sup>3</sup> | none                    | 64/65                   | —                    | MD 0.01 lower (15.08 lower to 15.06 higher) | ⊕⊕OO<br>LOW      | Important  |
| IL-6<br>[49, 50, 52, 53]    | RCT    | 4                | serious <sup>1,2</sup>   | no serious    | no serious   | serious <sup>3</sup> | none                    | 105/106                 | —                    | MD 11.37 lower (14.62 to 8.13 lower)        | ⊕⊕OO<br>LOW      | Important  |
| IL-2<br>[49, 50]            | RCT    | 2                | serious <sup>1,2,3</sup> | no serious    | no serious   | no serious           | none                    | 59/59                   | —                    | MD 20.72 lower (50.34 lower to 8.89 higher) | ⊕⊕OO<br>LOW      | Important  |
| Markers of immune system    |        |                  |                          |               |              |                      |                         |                         |                      |                                             |                  |            |
| IgA<br>[47, 49, 52]         | RCT    | 3                | serious <sup>1,2</sup>   | no serious    | no serious   | serious <sup>3</sup> | none                    | 89/89                   | —                    | MD 0.2 higher (0 to 0.4 higher)             | ⊕⊕OO<br>LOW      | Important  |

Supplemental Table 3 (continued)

| Outcomes                                          | Design | No of studies | Quality assessment       |               |              |                      |                      | No of patients (I/C)  | Effect                    |                                                                                                | Quality          | Importance |
|---------------------------------------------------|--------|---------------|--------------------------|---------------|--------------|----------------------|----------------------|-----------------------|---------------------------|------------------------------------------------------------------------------------------------|------------------|------------|
|                                                   |        |               | Risk of bias             | Inconsistency | Indirectness | Imprecision          | Other considerations |                       | Relative (95% CI)         | Absolute                                                                                       |                  |            |
| IgG<br>[47, 49]                                   | RCT    | 2             | serious <sup>1,2</sup>   | no serious    | no serious   | serious <sup>3</sup> | none                 | 74/74                 | —                         | MD 0.36 lower (1.47 lower to 0.75 higher)                                                      | ⊕⊕OO<br>LOW      | Important  |
| IgM<br>[47, 49, 52]                               | RCT    | 3             | serious <sup>1,2</sup>   | no serious    | no serious   | serious <sup>3</sup> | none                 | 89/89                 | —                         | MD 0 higher (0.11 lower to 0.1 higher)                                                         | ⊕⊕OO<br>LOW      | Important  |
| CD3<br>[49, 52]                                   | RCT    | 2             | serious <sup>1,2</sup>   | no serious    | no serious   | serious <sup>3</sup> | none                 | 56/56                 | —                         | MD 0.94 higher (6.76 lower to 8.64 higher)                                                     | ⊕⊕OO<br>LOW      | Important  |
| Clinical indexes                                  |        |               |                          |               |              |                      |                      |                       |                           |                                                                                                |                  |            |
| Infection<br>[47, 49, 51, 53, 54]                 | RCT    | 5             | serious <sup>1,2</sup>   | no serious    | no serious   | no serious           | none                 | 321 (36)/<br>321 (71) | OR 0.44<br>(0.28 to 0.71) | 110 fewer per 1000 (from 59 fewer to 148 fewer)/ 98 fewer per 1000 (from 43 fewer to 152 more) | ⊕⊕⊕O<br>MODERATE | Critical   |
| biliary leakage<br>[51, 54]                       | RCT    | 2             | serious <sup>1,2</sup>   | no serious    | no serious   | no serious           | none                 | 216 (11)/<br>215 (15) | OR 0.71<br>(0.32 to 1.59) | 19 fewer per 1000 (from 46 fewer to 37 more)/ 18 fewer per 1000 (from 43 fewer to 34 more)     | ⊕⊕⊕O<br>MODERATE | Critical   |
| Duration of hospital stay<br>[47, 49, 51, 53, 54] | RCT    | 5             | serious <sup>1,2</sup>   | no serious    | no serious   | serious <sup>3</sup> | none                 | 182/184               | —                         | MD 2.17 lower (3.04 to 1.3 lower)                                                              | ⊕⊕OO<br>LOW      | Important  |
| Mortality<br>[47, 49, 51, 53, 54]                 | RCT    | 5             | serious <sup>1,2,3</sup> | no serious    | no serious   | serious <sup>4</sup> | none                 | 321 (2)/<br>321 (9)   | OR 0.25<br>(0.06 to 1.03) | 21 fewer per 1000 (from 26 fewer to 1 more)/ 13 fewer per 1000 (from 16 fewer to 1 more)       | ⊕⊕OO<br>LOW      | Critical   |

Abbreviations: AST aspartate aminotransferase; ALT alanine aminotransferase; Tbil total bilirubin; Alb albumin; WBC white blood cell; TNF tumor necrosis factor alpha; IL-6 interleukin-6; IL-2 interleukin-2;

IgA Immunoglobulin A; IgG Immunoglobulin G; IgM Immunoglobulin M; CD3 CD3 – lymphocytes.

<sup>1</sup> In included studies, at least one element for the risk of bias is considered to have limitations in design. <sup>2</sup> Timing and duration of intervention were inconsistent. <sup>3</sup> Low sample size (n < 400). <sup>4</sup> The time of follow up was different.
